# Supplementary material
Source: PubMed Central journal article supplement (PMC3536254)
Supplement: JCM.02510-12_zjm999092225so1.pdf [file JCM.02510-12_zjm999092225so1.pdf]

TABLE S1. Primers and probes for multiplex real-time detection of *Legionella* spp., *Legionella pneumophila*, *Legionella pneumophila* sg1, and human DNA

| Primer/probe | Sequence (5'→3')                         | Gene target                     | Product (bp) | Primer/probe final concentration |
|--------------|------------------------------------------|---------------------------------|--------------|----------------------------------|
| PanLeg-F     | GGCGACCTGGCTTC                           | <i>ssrA</i>                     | 101          | 500 nmol/L                       |
| PanLeg-R1    | GGTCATCGTTTGCATTTATATTTA                 |                                 |              | 500 nmol/L                       |
| PanLeg-P1    | FAM-CGTGGGTTGCAA-MGBNFQ                  |                                 |              | 100 nmol/L                       |
| Lp-F         | TTGTCTTATAGCATTGGTGCCG                   | <i>mip</i>                      | 115          | 500 nmol/L                       |
| Lp-R         | CCAATTGAGCGCCACTCATAG                    |                                 |              | 500 nmol/L                       |
| Lp-P         | Quasar670-CGGAAGCAATGGCTAAAGGCATGCA-BHQ3 |                                 |              | 100 nmol/L                       |
| Lp1-F        | TGCCTCTGGCTTTGCAGTTA                     | <i>wzm</i>                      | 70           | 500 nmol/L                       |
| Lp1-R        | CACACAGGCACAGCAGAAACA                    |                                 |              | 500 nmol/L                       |
| Lp1-P        | VIC-TTTATTACTCCACTCCAGCGAT-MGBNFQ        |                                 |              | 100 nmol/L                       |
| RNase P-F    | AGATTTGGACCTGCGAGCG                      | RNase P<br>(Emery et al., 2004) | 62           | 125 nmol/L                       |
| RNase P-R    | GAGCGGCTGTCTCCACAAGT                     |                                 |              | 125 nmol/L                       |
| RNase P-P    | CalRd610-TTCTGACCTGAAGGCTCTGCGCG-BHQ2    |                                 |              | 25 nmol/L                        |

TABLE S2. *Legionella* and non-*Legionella* species panel used to test analytical specificity of the multiplex assay.

| Strains                              | No. of strains tested | Non- <i>Legionella</i> testing panel |
|--------------------------------------|-----------------------|--------------------------------------|
| <i>L. pneumophila</i> serogroup 1    | 73                    | <i>B. pertussis</i>                  |
| <i>L. pneumophila</i> serogroup 2-17 | 73                    | <i>C. albicans</i>                   |
| <i>L. adelaidensis</i>               | 1                     | <i>C. pneumoniae</i>                 |
| <i>L. anisa</i>                      | 3                     | <i>C. trachomatis</i>                |
| <i>L. beliardensis</i>               | 1                     | <i>C. psittaci</i>                   |
| <i>L. birminghamensis</i>            | 2                     | <i>C. diphtheriae</i>                |
| <i>L. bozemanii</i>                  | 2                     | <i>E. coli</i>                       |
| <i>L. brunensis</i>                  | 1                     | <i>H. influenzae</i> Type b          |
| <i>L. busanensis</i>                 | 1                     | <i>K. pneumoniae</i>                 |
| <i>L. cherrii</i>                    | 1                     | <i>L. planetarium</i>                |
| <i>L. cincinnatiensis</i>            | 1                     | <i>M. pneumoniae</i>                 |
| <i>L. drozanskii</i>                 | 1                     | <i>M. genitalium</i>                 |
| <i>L. dumoffii</i>                   | 1                     | <i>M. pirum</i>                      |
| <i>L. erythra</i>                    | 1                     | <i>M. salivarum</i>                  |
| <i>L. fairfieldensis</i>             | 1                     | <i>M. hominis</i>                    |
| <i>L. fallonii</i>                   | 1                     | <i>M. orale</i>                      |
| <i>L. feeleii</i>                    | 2                     | <i>M. buccale</i>                    |
| <i>L. geestiana</i>                  | 1                     | <i>M. facium</i>                     |
| <i>L. genom species</i>              | 1                     | <i>M. lipophilum</i>                 |
| <i>L. gormanii</i>                   | 1                     | <i>M. catarrhalis</i>                |
| <i>L. gratiana</i>                   | 1                     | <i>M. tuberculosis</i>               |
| <i>L. gresilensis</i>                | 1                     | <i>N. meningitidis</i>               |
| <i>L. hackleliae</i>                 | 2                     | <i>P. aeruginosa</i>                 |
| <i>L. impletisoli</i>                | 1                     | <i>S. aureus</i>                     |
| <i>L. israelensis</i>                | 1                     | <i>S. agalactiae</i>                 |
| <i>L. jamestowniensis</i>            | 1                     | <i>S. pneumoniae</i>                 |
| <i>L. jordanis</i>                   | 1                     | <i>S. pyogenes</i>                   |
| <i>L. lansingensis</i>               | 1                     | <i>T. gondii</i>                     |
| <i>L. longbeachae</i>                | 3                     | <i>U. urealyticum</i>                |
| <i>L. londiniensis</i>               | 1                     | human coronavirus                    |
| <i>L. lytica</i>                     | 1                     | human rhinovirus                     |
| <i>L. maceachernii</i>               | 1                     | human parainfluenza virus 1          |
| <i>L. micdadei</i>                   | 1                     | human parainfluenza virus 2          |
| <i>L. moravica</i>                   | 1                     | human parainfluenza virus 3          |
| <i>L. nagasakiensis</i>              | 2                     | human parainfluenza virus 4          |
| <i>L. nautarum</i>                   | 1                     | human adenovirus                     |
| <i>L. oakridgensis</i>               | 2                     | influenza virus A                    |
| <i>L. parisiensis</i>                | 1                     | influenza virus B                    |
| <i>L. qateirensis</i>                | 1                     | human respiratory syncytial virus    |
| <i>L. quinlavanii</i>                | 2                     | human rubella virus                  |
| <i>L. rowbowthamii</i>               | 1                     | human parechovirus                   |
| <i>L. rubriluscens</i>               | 1                     | human metapneumovirus                |
| <i>L. sainthelensis</i>              | 2                     | human enterovirus                    |
| <i>L. santicrucis</i>                | 1                     | Human DNA                            |
| <i>L. shakespearei</i>               | 1                     |                                      |
| <i>L. spiritensis</i>                | 2                     |                                      |
| <i>L. steigerwaltii</i>              | 1                     |                                      |
| <i>L. taurinensis</i>                | 1                     |                                      |
| <i>L. tucsonensis</i>                | 3                     |                                      |
| <i>L. wadsworthii</i>                | 1                     |                                      |
| <i>L. waltersii</i>                  | 1                     |                                      |
| <i>L. worsleiensis</i>               | 1                     |                                      |
| <i>L. yabuchiae</i>                  | 1                     |                                      |
| Unidentified <i>Legionella</i> (LLO) | 3                     |                                      |
| Total                                | 215                   |                                      |
